# Supplementary material for: Mindfulness-Based School Interventions: a Systematic Review of Outcome Evidence Quality by Study Design
Source: Springer Nature journal article supplement (doi:10.1007/s12671-022-01885-9), 2022-05-23
Supplement: MOESM1 [file 22832882]

# **Mindfulness-based school interventions: A systematic review of outcome evidence quality by study design**

## *Mindfulness*

Mary L. Phan<sup>1</sup>, Tyler L. Renshaw<sup>1</sup>, Julie Caramanico<sup>2</sup>, Jeffrey M. Greeson<sup>3</sup>, Elizabeth MacKenzie<sup>4</sup>, Zabryna Atkinson-Diaz<sup>2</sup>, Natalie Doppelt<sup>2</sup>, Hungtzu Tai<sup>5</sup>, David S. Mandell<sup>2</sup>, and Heather J. Nuske<sup>2</sup>

<sup>1</sup>Department of Psychology, Utah State University, Logan, USA

<sup>2</sup>Penn Center for Mental Health, University of Pennsylvania, Philadelphia, USA

<sup>3</sup>Department of Psychology, Rowan University, Glassboro, USA

<sup>4</sup>Graduate School of Education, University of Pennsylvania, Philadelphia, USA

<sup>5</sup>School of Health in Social Science, University of Edinburgh, United Kingdom

Corresponding author email: [mary.phan@usu.edu](mailto:mary.phan@usu.edu)

## Online Resource 1

### *Demographics Included in Review*

| Author (year)                  | Country   | Participants: Sample size | Child gender         | Child age range | Child ethnicity                                                                               | SES                                                        | Children with special needs? (If yes, specify) | School level      | Classroom setting | Public vs Private                            |
|--------------------------------|-----------|---------------------------|----------------------|-----------------|-----------------------------------------------------------------------------------------------|------------------------------------------------------------|------------------------------------------------|-------------------|-------------------|----------------------------------------------|
| 01. Atkinson & Wade (2015)     | Australia | 347                       | All female           | 14-18           | Caucasian (84%), with the remainder identifying as Asian (8%), African (1%), or Other (4%)    | N/A                                                        | No                                             | High school       | General ed        | Two catholic schools and two private schools |
| 02. Bakosh et al (2016)        | USA       | 93                        | 50 male 43 female    | N/A             | N/A                                                                                           | Some are from low SES (23% of the participants)            | No                                             | Elementary school | General ed        | Public                                       |
| 03. Bakosh et al (2018)        | USA       | 337                       | 161 girls, 176 boys  | 6-11            | 74% Hispanic (school 1); 97% White (school 2)                                                 | one school mainly low SES students, while the other is not | No                                             | Elementary school | General ed        | N/A                                          |
| 04. Bannirchelvam et al (2017) | Australia | 8                         | 4 girls, 4 boys      | 7-11            | N/A                                                                                           | N/A                                                        | No                                             | Elementary school | General ed        | Public                                       |
| 05. Bauer et al (2019)         | USA       | 40                        | 70% female, 30% male | M=11.76         | 10% Hispanic, 32.5% African American, 52.5% White, and 5% other or multiple racial identities | 47.5% are low income families                              | No                                             | Middle school     | General ed        | Public                                       |
| 06. Beauchemin et al (2008)    | USA       | 34                        | 71% male             | 8-12            | N/A                                                                                           | N/A                                                        | Learning Disability                            | High school       | Special ed        | Private                                      |

| Author (year)                  | Country     | Participants:<br>Sample size | Child gender               | Child age<br>range | Child ethnicity                                                                      | SES          | Children with<br>special needs?<br>(If yes, specify) | School level         | Classroom<br>setting  | Public vs<br>Private  |
|--------------------------------|-------------|------------------------------|----------------------------|--------------------|--------------------------------------------------------------------------------------|--------------|------------------------------------------------------|----------------------|-----------------------|-----------------------|
| 07. Bei et al<br>(2013)        | USA         | 62                           | All female                 | 13-15              | N/A                                                                                  | N/A          | No                                                   | High school          | General ed            | Private               |
| 08. Bennett &<br>Dorjee (2015) | UK          | 23                           | N/A                        | 16-18              | N/A                                                                                  | N/A          | No                                                   | High school          | General ed            | N/A                   |
| 09. Berger et al<br>(2018)     | Israel      | 224                          | 137 females                | 8-11               | N/A                                                                                  | Middle class | No                                                   | Elementary<br>school | General ed            | Public                |
| 10. Bernay et al<br>(2016)     | New Zealand | 124                          | 53% female<br>and 47% male | 9-12               | 82 European, 36<br>Asian, 6 other                                                    | N/A          | No                                                   | Elementary<br>school | General ed            | Public                |
| 11. Black &<br>Fernando (2014) | USA         | 409                          | N/A                        | N/A                | 52.3 % Hispanic,<br>28.0 % Black,<br>15.0 % Asian, 4.3<br>% White, and .4<br>% other | N/A          | No                                                   | Elementary<br>school | General ed            | Public                |
| 12. Bluth et al<br>(2016)      | USA         | 27                           | 73% male,<br>27% female    | 14-18              | 54 % Hispanic,<br>24% African-<br>American, 18%<br>Caucasian, and<br>3% other        | N/A          | No                                                   | High school          | Alternative<br>school | Alternative<br>school |

| Author (year)                  | Country   | Participants:<br>Sample size | Child gender                                                                | Child age<br>range                         | Child ethnicity                                                                                                                                                                                                                                                                                                         | SES                                  | Children with<br>special needs?<br>(If yes, specify) | School level                       | Classroom<br>setting | Public vs<br>Private |
|--------------------------------|-----------|------------------------------|-----------------------------------------------------------------------------|--------------------------------------------|-------------------------------------------------------------------------------------------------------------------------------------------------------------------------------------------------------------------------------------------------------------------------------------------------------------------------|--------------------------------------|------------------------------------------------------|------------------------------------|----------------------|----------------------|
| 13. Bradley et al<br>(2018)    | USA       | 507 students,<br>49 teachers | Students: 258<br>male, 249<br>female;<br>teachers: 37<br>female 12<br>males | Student M<br>= 9.3,<br>teacher M<br>= 45.9 | Student: 53%<br>Caucasian, 15.5%<br>Hispanic/Latino,<br>9.9%<br>Asian/Indian,<br>8.2% Multiracial,<br>6.9% African<br>American, 3.2%<br>Asian American,<br>2.4% Middle<br>Eastern, and 0.4%<br>Native American.<br>Teacher: 87.8%<br>Caucasian, 2.0%<br>Hispanic/Latino,<br>2.0% African<br>American, and<br>8.2% Other | N/A                                  | No                                                   | Elementary<br>and middle<br>school | General ed           | Private              |
| 14. Britton et al<br>(2014)    | USA       | 101                          | 55 boys, 46<br>girls                                                        | M=11.79                                    | N/A                                                                                                                                                                                                                                                                                                                     | N/A                                  | No                                                   | Middle school                      | General ed           | N/A                  |
| 15. Broderick &<br>Metz (2009) | USA       | 120                          | All female                                                                  | M=17.4                                     | 93.3% White,<br>2.5% Hispanic,<br>2.5% Asian, 1.7%<br>other                                                                                                                                                                                                                                                             | N/A                                  | No                                                   | High school                        | General ed           | Private              |
| 16. Burckhardt et<br>al (2017) | Australia | 48                           | 58% males,<br>42% females                                                   | 14-16                                      | N/A                                                                                                                                                                                                                                                                                                                     | Socio-<br>economically<br>advantaged | No                                                   | High school                        | General ed           | Private              |

| Author (year)                  | Country   | Participants: Sample size | Child gender                         | Child age range | Child ethnicity                                                                                                                               | SES                                | Children with special needs? (If yes, specify) | School level                 | Classroom setting  | Public vs Private  |
|--------------------------------|-----------|---------------------------|--------------------------------------|-----------------|-----------------------------------------------------------------------------------------------------------------------------------------------|------------------------------------|------------------------------------------------|------------------------------|--------------------|--------------------|
| 17. Costello & Lawler (2014)   | Ireland   | 63                        | 17 boys, 46 girls                    | 11-12           | N/A                                                                                                                                           | At risk of socioeconomic exclusion | No                                             | Middle school                | General ed         | N/A                |
| 18. Crescentini et al (2016)   | Italy     | 16                        | 8 boys 8 girls                       | 7-8             | N/A                                                                                                                                           | N/A                                | No                                             | Elementary school            | General ed         | N/A                |
| 19. Davenport & Pagnini (2016) | USA       | N/A                       | N/A                                  | N/A             | N/A                                                                                                                                           | N/A                                | No                                             | Elementary school            | General ed         | Mixed              |
| 20. der Gucht et al (2017)     | Belgium   | 605                       | 70% female                           | 13-20           | N/A                                                                                                                                           | N/A                                | No                                             | High school                  | General ed         | N/A                |
| 21. Dove & Costello (2017)     | Australia | 57                        | 37 males                             | 9-10            | N/A                                                                                                                                           | N/A                                | No                                             | Elementary school            | General ed         | N/A                |
| 22. Emerson et al (2017)       | UK        | 26                        | 14 girls, 12 boys                    | M=6.6           | Mostly White                                                                                                                                  | N/A                                | Autism spectrum disorder, Down syndrome        | Elementary school            | General ed         | N/A                |
| 23. Eva & Thayer (2017)        | USA       | 23                        | 65% male                             | 17-20           | 75% African American                                                                                                                          | N/A                                | No                                             | High school                  | Alternative school | Alternative school |
| 24. Felver et al (2013)        | USA       | 3                         | All male                             | 8-9             | N/A                                                                                                                                           | N/A                                | No                                             | Elementary school            | General ed         | Public             |
| 25. Flook et al (2015)         | USA       | 68                        | 34 girls (50.0%) and 33 boys (48.5%) | M = 4.67        | 40 White (58.8%), 8 Hispanic (11.8%), 4 African American (5.9%), 7 Asian/Pacific Islander (10.3%), 8 "Other"/mixed ethnicity children (11.8%) | Low SES                            | No                                             | Elementary school            | General ed         | Public             |
| 26. Franco et al (2016)        | Spain     | 27                        | 59% boys, 41% girls                  | 12-19           | N/A                                                                                                                                           | N/A                                | No                                             | High school                  | General ed         | Public             |
| 27. Fung et al (2016)          | USA       | 19                        | 8 boys, 11 girls                     | 12-14           | Asian and Latino                                                                                                                              | N/A                                | No                                             | Elementary and middle school | General ed         | Public             |

| Author (year)              | Country          | Participants: Sample size | Child gender                      | Child age range                  | Child ethnicity                                                            | SES                                   | Children with special needs? (If yes, specify) | School level                 | Classroom setting | Public vs Private         |
|----------------------------|------------------|---------------------------|-----------------------------------|----------------------------------|----------------------------------------------------------------------------|---------------------------------------|------------------------------------------------|------------------------------|-------------------|---------------------------|
| 28. Gouda et al (2016)     | Germany          | 29 students, 29 teachers  | All female students, N/A teachers | Student M = 16.2, teacher m=45.9 | N/A                                                                        | N/A                                   | No                                             | High school                  | General ed        | N/A                       |
| 29. Gould et al (2012)     | USA              | 97                        | 60.8% female, 39.2% male          | 9.7-10.6                         | 83.5% African American, 4.1% Latino, 4.1% Caucasian, 7.2% other            | Low SES                               | No                                             | Elementary school            | General ed        | Public                    |
| 30. Idler et al (2017)     | British Columbia | 4                         | 2 girls, 2 boys                   | 8-11                             | Mostly English                                                             | N/A                                   | No                                             | Elementary school            | General ed        | Private                   |
| 31. Janz et al (2019)      | Australia        | 55                        | 34 boys, 21 girls                 | M=6.3                            | 8% indigenous Australian, 23% had a language background other than English | Low SES                               | No                                             | Elementary school            | General ed        | N/A                       |
| 32. Johnson et al (2016)   | Australia        | 308                       | 47.7% female, 52.3% male          | M=13.63                          | N/A                                                                        | N/A                                   | No                                             | High school                  | General ed        | One private, three public |
| 33. Johnson et al (2017)   | Australia        | 555                       | 45.4% girls, 54.6% boys           | M=13.4                           | N/A                                                                        | A broad range of socioeconomic status | No                                             | High school                  | General ed        | One private, three public |
| 34. Juliano et al (2020)   | USA              | 27                        | 77.8% boys                        | M=13.60                          | 88.9 % White, 3.7 % African American, 4.4% Hispanic                        | N/A                                   | Autism Spectrum Disorder                       | Middle and high school       | General ed        | Private                   |
| 35. Kang et al (2018)      | USA              | 100                       | 46 females, 54 males              | M = 11.79                        | N/A                                                                        | N/A                                   | N/A                                            | Middle School                | General Ed        | Private                   |
| 36. Kasson & Wilson (2016) | USA              | 21                        | 61.5% male                        | M= 8.5                           | N/A                                                                        | N/A                                   | No                                             | Elementary and middle school | General ed        | N/A                       |

| Author (year)                        | Country            | Participants: Sample size       | Child gender                                              | Child age range                 | Child ethnicity                                         | SES                              | Children with special needs? (If yes, specify) | School level           | Classroom setting                     | Public vs Private                             |
|--------------------------------------|--------------------|---------------------------------|-----------------------------------------------------------|---------------------------------|---------------------------------------------------------|----------------------------------|------------------------------------------------|------------------------|---------------------------------------|-----------------------------------------------|
| 37. Keller et al (2017)              | USA                | 28                              | 64% female, 36% male                                      | 10-11                           | 89% Hispanic, 11% Black                                 | Low SES                          | No                                             | Elementary school      | General ed                            | N/A                                           |
| 38. Kielty et al (2017)              | USA                | 45                              | 22 girls, 22 boys, 1 unidentified                         | 8-9                             | 84% Caucasian                                           | Low SES                          | No                                             | Elementary school      | General ed                            | N/A                                           |
| 39. Klatt et al (2013)               | USA                | 41                              | 16 boys 25 girls                                          | M=8.54                          | 8 Caucasian, 18 African American, 11 Somali, 4 Hispanic | Low SES                          | No                                             | Elementary school      | General ed                            | Public                                        |
| 40. Kurth et al (2020)               | Germany            | 106                             | 58% female, 42% male                                      | 5-11                            | German                                                  | N/A                              | N/A                                            | Elementary school      | General Ed                            | Public                                        |
| 41. Lagor et al (2013)               | USA                | 15                              | 9 females, 6 males                                        | 8-18                            | 11 African American, 2 White, 1 biracial, 1 Latino      | Annual income less than \$30,000 | No                                             | Middle and high school | Special ed                            | Specialized school                            |
| 42. Lam (2016)                       | China              | 20                              | 11 females 9 male                                         | 9-13                            | Chinese                                                 | Lower to middle class            | No                                             | Elementary school      | General ed                            | N/A                                           |
| 43. Lassander et al (2020)           | Finland            | 131                             | 56.5% females, 43.5% males                                | 12-15                           | Finnish                                                 | N/A                              | N/A                                            | Middle School          | General Ed                            | Public                                        |
| 44. Le & Gobert (2015)               | USA                | 8                               | 5 males                                                   | 15-20                           | Native American                                         | N/A                              | No                                             | High school            | General ed                            | N/A                                           |
| 45. Le & Trieu (2016)                | Vietnam            | 10                              | N/A                                                       | 15-18                           | Vietnamese                                              | N/A                              | No                                             | High school            | General Ed                            | A semi-private school and a vocational school |
| 46. Livheim et al (2015)             | Australia & Sweden | Australia study: 66, Sweden: 32 | Australia: 8 male, 58 female<br>Sweden: 9 male, 23 female | Australia: 12-18, Sweden: 14-15 | Australian and Swedish                                  | N/A                              | No                                             | High school            | General ed and one alternative school | N/A                                           |
| 47. Malboeuf-Hurtubise et al (2017a) | Canada             | 3                               | 2 boys 1 girl                                             | 9-10                            | 1 Caucasian, 1 Haitian, 1 Hispanic                      | Low SES                          | No                                             | Elementary school      | General ed                            | N/A                                           |

| Author (year)                        | Country | Participants:<br>Sample size | Child gender             | Child age<br>range | Child ethnicity                                                            | SES                   | Children with<br>special needs?<br>(If yes, specify) | School level                 | Classroom<br>setting | Public vs<br>Private                          |
|--------------------------------------|---------|------------------------------|--------------------------|--------------------|----------------------------------------------------------------------------|-----------------------|------------------------------------------------------|------------------------------|----------------------|-----------------------------------------------|
| 48. Malboeuf-Hurtubise et al (2017b) | Canada  | 14                           | 8 girls, 6 boys          | M=10.7             | N/A                                                                        | Low SES               | Learning Disability                                  | Elementary school            | Special ed           | N/A                                           |
| 49. Metz et al (2013)                | USA     | 244                          | 34.9% male, 65.1% female | M=16.5             | 90% White, 10% other (Latino, Black, Asian or Native American)             | Middle to high income | No                                                   | High school                  | General ed           | Public                                        |
| 50. Milligan et al (2016)            | USA     | 17                           | 10 males 7 females       | 13-17              | N/A                                                                        | N/A                   | No                                                   | High school                  | General ed           | N/A                                           |
| 51. Napoli et al (2005)              | USA     | 228                          | 120 males 108 females    | N/A                | N/A                                                                        | N/A                   | No                                                   | Elementary school            | General ed           | N/A                                           |
| 52. Parker et al (2014)              | USA     | 71                           | 30 boys, 41 girls        | 9-11               | 64 European-American, 14 African American, 23 other                        | N/A                   | No                                                   | Elementary School            | General ed           | A semi-private school and a vocational school |
| 53. Poehlmann-Tynan et al (2016)     | USA     | 29                           | 51% boys, 49% girls      | 3-5                | 72% non-white                                                              | Low SES               | No                                                   | Preschool                    | General ed           | N/A                                           |
| 54. Raes et al (2014)                | Belgium | 408                          | 68% female 33% male      | 13-20              | N/A                                                                        | N/A                   | No                                                   | High school                  | General ed           | N/A                                           |
| 55. Ricarte et al (2015)             | Spain   | 45                           | 29 boys, 16 girls        | 6-13               | Spanish                                                                    | Low SES               | No                                                   | Middle school                | General ed           | Public                                        |
| 56. Rush et al (2017)                | USA     | 33                           | 29 boys 4 girls          | 8-13               | N/A                                                                        | N/A                   | Emotional disturbance (ED)                           | Elementary and middle school | Special ed           | N/A                                           |
| 57. Schonert-Reichl & Lawlor (2010)  | Canada  | 246                          | 48% female               | 9-13               | 57% English speaking, 23% east Asian, 20% other (Spanish, Russian, Polish) | Median income level   | No                                                   | Elementary school            | General ed           | N/A                                           |



| Author (year)                    | Country | Participants:<br>Sample size | Child gender                  | Child age<br>range | Child ethnicity                                                                           | SES                                                                                                             | Children with<br>special needs?<br>(If yes, specify) | School level      | Classroom<br>setting | Public vs<br>Private |
|----------------------------------|---------|------------------------------|-------------------------------|--------------------|-------------------------------------------------------------------------------------------|-----------------------------------------------------------------------------------------------------------------|------------------------------------------------------|-------------------|----------------------|----------------------|
| 58. Schonert-Reichl et al (2015) | Canada  | 99                           | 44% female,<br>46% male       | 9-11               | 66 % English speaking, 25% east Asian, 10% other (Russian, Spanish, Polish)               | Median level                                                                                                    | No                                                   | Elementary school | General ed           | Public               |
| 59. Schussler et al (2018)       | USA     | 21 teachers                  | N/A                           | 22-73              | 33% white, 31% Hispanic, 26% African American, 4% Asian American, and 5% mixed background | N/A                                                                                                             | No                                                   | Elementary school | General ed           | N/A                  |
| 60. Scitutto et al (2021)        | USA     | 105                          | 47 females, 58 males          | 5-9                | 77% Hispanic, 13% African American, 5% White, 3% Multi-Racial, 1% Asian                   | 94% receive free or reduced lunch                                                                               | N/A                                                  | Elementary school | General Ed           | Public               |
| 61. Shapiro et al (2016)         | Canada  | 565                          | 57.52% female,<br>42.48% male | 14-16              | N/A                                                                                       | Low SES urban (10%), middle SES urban (30%), middle SES suburban (40%), to high SES independent fee based (20%) | No                                                   | High school       | General ed           | Public               |

| Author (year)                          | Country     | Participants: Sample size | Child gender            | Child age range | Child ethnicity                                            | SES                                           | Children with special needs? (If yes, specify) | School level                 | Classroom setting         | Public vs Private |
|----------------------------------------|-------------|---------------------------|-------------------------|-----------------|------------------------------------------------------------|-----------------------------------------------|------------------------------------------------|------------------------------|---------------------------|-------------------|
| 62. Sibinga et al (2013)               | USA         | 44                        | All boys                | M=12.5          | 95% African American                                       | Low SES                                       | No                                             | Middle school                | General ed                | N/A               |
| 63. Sibinga et al (2016)               | USA         | 300                       | 50.7% female            | M= 12           | 99.7% African American                                     | N/A                                           | No                                             | Elementary and middle school | General ed                | Public            |
| 64. Terjestam et al (2016)             | Sweden      | 358                       | 173 girls, 185 boys     | 10-14           | N/A                                                        | Mostly urban to low-income area               | No                                             | High school                  | General ed                | Public            |
| 65. Tharaldsen (2012)                  | Norway      | 40                        | 75% female<br>25% male  | 17-21           | N/A                                                        | N/A                                           | No                                             | High school                  | Vocational and general ed | Public            |
| 66. Thomas & Atkinson (2017)           | UK          | 30                        | 50% female              | 8-10            | Ethnically diverse                                         | N/A                                           | No                                             | Elementary school            | General ed                | N/A               |
| 67. van de Weijer-Bergsma et al (2012) | Netherlands | 208                       | 110 females, 98 males   | 8-12            | Ethnically diverse                                         | N/A                                           | No                                             | Elementary school            | General ed                | Public            |
| 68. Viafora et al (2015)               | USA         | 38                        | 22 females, 16 males    | 7-18            | 34 Latino, 1 White, 1 African American, 2 mixed race/other | N/A (but there are low-SES students involved) | No                                             | Middle and high school       | General ed                | Charter school    |
| 69. Vickery & Dorjee (2016)            | UK          | 71                        | 36 male                 | 7-9             | N/A                                                        | N/A                                           | No                                             | Elementary school            | General ed                | N/A               |
| 70. Volanen et al (2020)               | Finland     | 3519                      | 1,752 boys, girls 1,750 | 12-15           | Finnish                                                    | N/A                                           | No                                             | Middle school                | General ed                | N/A               |
| 71. Waldemar et al (2016)              | Brazil      | 132                       | 52.3% male              | 10-14           | 52.7% hite                                                 | Lower to middle class                         | No                                             | Elementary school            | General ed                | Public            |
| 72. Wilson & Dixon (2010)              | USA         | 12                        | 5 males, 7 females      | M=8             | N/A                                                        | N/A                                           | No                                             | Elementary school            | General ed                | Private           |
| 73. Wimmer et al (2016)                | Germany     | 34                        | 16 male, 18 female      | M=10.8          | N/A                                                        | N/A                                           | No                                             | Elementary school            | General ed                | N/A               |
| 74. Wisner (2013)                      | USA         | 35                        | 19 boys 16 girls        | 15-19           | 34 Caucasian, 1 African American                           | N/A                                           | No                                             | High school                  | Alternative school        | Public            |

| Author (year)                 | Country | Participants:<br>Sample size | Child gender           | Child age<br>range | Child ethnicity                                                            | SES     | Children with<br>special needs?<br>(If yes, specify) | School level      | Classroom<br>setting | Public vs<br>Private |
|-------------------------------|---------|------------------------------|------------------------|--------------------|----------------------------------------------------------------------------|---------|------------------------------------------------------|-------------------|----------------------|----------------------|
| 75. Wisner & Starzec (2016)   | USA     | 19                           | 10 boys 9 girls        | 15-17              | 17 Caucasian, 1 African American, 1 Hispanic, 1 European American          | Low SES | No                                                   | High school       | Alternative school   | Public               |
| 76. Worthen & Luiselli (2017) | USA     | 84                           | 50% male<br>50% female | M=14.5             | N/A                                                                        | N/A     | No                                                   | High school       | General ed           | Private              |
| 77. Zelazo et al (2018)       | USA     | 218                          | 101 males 117 females  | 47-63 months       | 55% White, 32% more than one race, African American 9%, native American 3% | Low SES | No                                                   | Elementary school | General ed           | N/A                  |

Note. N/A means not available
