# Supplementary material for: Mindfulness-Based School Interventions: a Systematic Review of Outcome Evidence Quality by Study Design
Source: Springer Nature journal article supplement (doi:10.1007/s12671-022-01885-9), 2022-05-23
Supplement: MOESM2 [file 22832882]

**Mindfulness-based school interventions: A systematic review of outcome evidence quality by study design**

*Mindfulness*

Mary L. Phan<sup>1</sup>, Tyler L. Renshaw<sup>1</sup>, Julie Caramanico<sup>2</sup>, Jeffrey M. Greeson<sup>3</sup>, Elizabeth MacKenzie<sup>4</sup>, Zabryna Atkinson-Diaz<sup>2</sup>, Natalie Doppelt<sup>2</sup>, Hungtzu Tai<sup>5</sup>, David S. Mandell<sup>2</sup>, and Heather J. Nuske<sup>2</sup>

<sup>1</sup>Department of Psychology, Utah State University, Logan, USA

<sup>2</sup>Penn Center for Mental Health, University of Pennsylvania, Philadelphia, USA

<sup>3</sup>Department of Psychology, Rowan University, Glassboro, USA

<sup>4</sup>Graduate School of Education, University of Pennsylvania, Philadelphia, USA

<sup>5</sup>School of Health in Social Science, University of Edinburgh, United Kingdom

Corresponding author email: [mary.phan@usu.edu](mailto:mary.phan@usu.edu)

**Online Resource 2***Design and Methods Included in Review*

| Author (year)                  | MBI                                                                            | Research design | Evaluation design                             | Control               | Mediator           | Outcome measure type          | Teacher training | Evidence rating |
|--------------------------------|--------------------------------------------------------------------------------|-----------------|-----------------------------------------------|-----------------------|--------------------|-------------------------------|------------------|-----------------|
| 01. Atkinson & Wade (2015)     | Based off of the "body project" - mindfulness, acceptance based practice, MBCT | Quantitative    | RCT                                           | Active control group  | Researcher         | Self-report                   | No               | 1-              |
| 02. Bakosh et al (2016)        | Mindful-based social emotional learning (MBSEL) program                        | Mixed           | Pre-post (with non randomized control group)  | Active control group  | Teacher            | Teacher report                | Yes              | 2+              |
| 03. Bakosh et al (2018)        | Audio-guided MBI and MBSR-adapted program for 10 weeks                         | Quantitative    | RCT                                           | Passive control group | Teacher            | Teacher report                | Yes              | 1+              |
| 04. Bannirchelvam et al (2017) | 8 week MBI                                                                     | Qualitative     | Case series                                   | No control group      | Trained instructor | Self-report                   | No               | 2-              |
| 05. Bauer et al (2019)         | 8 week mindfulness program                                                     | Quantitative    | RCT                                           | Active control group  | Trained instructor | Self-report & cognitive tests | No               | 1+              |
| 06. Beauchemin et al (2008)    | 5 week mindfulness meditation program                                          | Mixed           | Pre-post comparison (without a control group) | No control group      | Teacher            | Teacher report & self-report  | Yes              | 2-              |

| Author (year)               | MBI                                              | Research design | Evaluation design                             | Control               | Mediator               | Outcome measure type         | Teacher training | Evidence rating |
|-----------------------------|--------------------------------------------------|-----------------|-----------------------------------------------|-----------------------|------------------------|------------------------------|------------------|-----------------|
| 07. Bei et al (2013)        | Six-session program based on Bootzin & Stevens   | Quantitative    | Pre-post comparison (without a control group) | No control group      | N/A                    | Self-report                  | No               | 2-              |
| 08. Bennett & Dorjee (2015) | MBSR                                             | Mixed           | Pre-post (with non randomized control group)  | Passive control group | Researcher             | Self-report                  | No               | 2+              |
| 09. Berger et al (2018)     | Call to Care-Israel (C2C-I)                      | Quantitative    | RCT                                           | Passive control group | Researcher and teacher | Self-report                  | No               | 1+              |
| 10. Bernay et al (2016)     | Pause Breathe Smile: 8 lesson mindfulness module | Mixed           | Pre-post comparison (without a control group) | No control group      | Trained instructor     | Observation & self-report    | No               | 1++             |
| 11. Black & Fernando (2014) | 5-week mindfulness based curriculum              | Quantitative    | Pre-post (with non randomized control group)  | Active control group  | Mindfulness instructor | Teacher report               | No               | 2-              |
| 12. Bluth et al (2016)      | Learning to BREATHE                              | Quantitative    | RCT                                           | Active control group  | Trained instructor     | Self-report                  | No               | 1-              |
| 13. Bradley et al (2018)    | Four Pillars of Well-being Curriculum            | Quantitative    | Pre-post comparison (without a control group) | No control group      | Teacher                | Teacher report & self-report | Yes              | 2-              |
| 14. Britton et al (2014)    | 6 week mindfulness education program             | Quantitative    | RCT                                           | Active control group  | Teacher                | Self-report                  | Yes              | 1-              |
| 15. Broderick & Metz (2009) | Learning to BREATHE                              | Mixed           | RCT                                           | Passive control group | Researcher             | Self-report                  | No               | 1-              |

| Author (year)                  | MBI                                                                  | Research design | Evaluation design                             | Control              | Mediator           | Outcome measure type         | Teacher training | Evidence rating |
|--------------------------------|----------------------------------------------------------------------|-----------------|-----------------------------------------------|----------------------|--------------------|------------------------------|------------------|-----------------|
| 16. Burckhardt et al (2017)    | ACT                                                                  | Quantitative    | RCT                                           | Active control group | Researcher         | Self-report                  | Yes              | 1-              |
| 17. Costello & Lawler (2014)   | 5-week school-based mindfulness program                              | Mixed           | Pre-post comparison (without a control group) | No control group     | Teacher            | Self-report                  | Yes              | 2-              |
| 18. Crescentini et al (2016)   | 8 week mindfulness-oriented intervention                             | Quantitative    | RCT                                           | Active control group | Researcher         | Teacher report & self-report | No               | 1++             |
| 19. Davenport & Pagnini (2016) | Langerian Mindfulness                                                | Qualitative     | Case study                                    | No control group     | Teacher            | N/A                          | Yes              | 3               |
| 20. der Gucht et al (2017)     | 8 week MBSR                                                          | Quantitative    | RCT                                           | Active control group | Trained instructor | Self-report                  | No               | 1-              |
| 21. Dove & Costello (2017)     | TRIPLE R: Robust, Resilient, Ready to Go 6 week intervention program | Quantitative    | Pre-post comparison (without a control group) | No control group     | Researcher         | Self-report                  | No               | 2+              |
| 22. Emerson et al (2017)       | 4 week mindfulness program                                           | Mixed           | Pre-post comparison (without a control group) | No control group     | Researcher         | Self-report                  | No               | 2-              |

| Author (year)           | MBI                                                                                              | Research design | Evaluation design                             | Control               | Mediator                              | Outcome measure type                                    | Teacher training | Evidence rating |
|-------------------------|--------------------------------------------------------------------------------------------------|-----------------|-----------------------------------------------|-----------------------|---------------------------------------|---------------------------------------------------------|------------------|-----------------|
| 23. Eva & Thayer (2017) | Learning to BREATHE: A Curriculum for Cultivating Emotion regulation, Attention, and Performance | Mixed           | Pre-post comparison (without a control group) | No control group      | Counselor                             | Self-report                                             | No               | 2-              |
| 24. Felver et al (2013) | Soles of the Feet (SOF)                                                                          | Qualitative     | Case series                                   | No control group      | Researcher                            | Teacher report, student self-report, direct observation | No               | 3               |
| 25. Flook et al (2015)  | 12-week mindfulness-based Kindness Curriculum                                                    | Quantitative    | RCT                                           | Passive control group | Researcher and mindfulness instructor | Teacher report & cognitive tests                        | No               | 1+              |
| 26. Franco et al (2016) | Meditación Fluir for 10 weeks                                                                    | Mixed           | RCT                                           | Passive control group | Counselor                             | Self-report                                             | Yes              | 1+              |
| 27. Fung et al (2016)   | 12 week MBI                                                                                      | Quantitative    | RCT                                           | Passive control group | N/A                                   | Self-report & parent report                             | No               | 1-              |
| 28. Gouda et al (2016)  | MBSR                                                                                             | Quantitative    | Pre-post (with non randomized control group)  | Passive control group | Trained instructor                    | Self-report                                             | Yes              | 2-              |
| 29. Gould et al (2012)  | 12 week yoga-inspired mindfulness program                                                        | Quantitative    | Pre-post (with non randomized control group)  | Passive control group | Researcher                            | Self-report                                             | No               | 2-              |

| Author (year)              | MBI                                                                                 | Research design | Evaluation design                             | Control               | Mediator               | Outcome measure type             | Teacher training | Evidence rating |
|----------------------------|-------------------------------------------------------------------------------------|-----------------|-----------------------------------------------|-----------------------|------------------------|----------------------------------|------------------|-----------------|
| 30. Idler et al (2017)     | 12 week mindfulness and fluency program                                             | Mixed           | Pre-post (with non randomized control group)  | Active control group  | Researcher             | Self-report & cognitive tests    | No               | 3               |
| 31. Janz et al (2019)      | Calmspace                                                                           | Quantitative    | RCT                                           | Passive control group | Teacher                | Teacher report & cognitive tests | Yes              | 1++             |
| 32. Johnson et al (2016)   | Dot b intervention                                                                  | Mixed           | RCT                                           | Active control group  | Researcher             | Teacher report & self-report     | No               | 1-              |
| 33. Johnson et al (2017)   | 9 week mindfulness education program                                                | Quantitative    | RCT                                           | Active control group  | Teacher                | Self-report & parent report      | No               | 1-              |
| 34. Juliano et al (2020)   | 8 week MBI – Mindful Schools                                                        | Quantitative    | Pre-post comparison (without a control group) | No control group      | Trained instructor     | Neuropsychological measures      | No               | 2-              |
| 35. Kang et al (2018)      | 6 Week Mindfulness Meditation                                                       | Quantitative    | RCT                                           | Active control group  | Teacher                | Self-report                      | Yes              | 1++             |
| 36. Kasson & Wilson (2016) | Mindfulness-based strategies with a classroom behavior management treatment package | Quantitative    | Case series                                   | No control group      | Teacher                | Teacher report & observation     | Yes              | 2-              |
| 37. Keller et al (2017)    | 10 week mindfulness education program                                               | Mixed           | RCT                                           | Active control group  | Researcher and teacher | Teacher report & cognitive tests | Yes              | 1+              |

| Author (year)              | MBI                                                                                                 | Research design | Evaluation design                             | Control               | Mediator           | Outcome measure type                    | Teacher training | Evidence rating |
|----------------------------|-----------------------------------------------------------------------------------------------------|-----------------|-----------------------------------------------|-----------------------|--------------------|-----------------------------------------|------------------|-----------------|
| 38. Kieley et al (2017)    | 30-min classroom lessons from the Mindful Schools, Mindup curricula and original material developed | Mixed           | Pre-post comparison (without a control group) | No control group      | Researcher         | Teacher report & self-report            | No               | 2+              |
| 39. Klatt et al (2013)     | Move-Into-Learning (MIL) 8 week intervention                                                        | Qualitative     | Pre-post comparison (without a control group) | No control group      | Researcher         | Teacher report                          | No               | 2-              |
| 40. Kurth et al (2020)     | Mindful Breathing Intervention                                                                      | Quantitative    | RCT                                           | Active control group  | Teacher            | Computer task                           | Yes              | 1+              |
| 41. Lagor et al (2013)     | 8 week mindfulness group intervention                                                               | Mixed           | Pre-post comparison (without a control group) | No control group      | Teacher            | Self-report                             | No               | 2-              |
| 42. Lam (2016)             | MBCT - 80 minute weekly group sessions                                                              | Quantitative    | RCT                                           | Passive control group | Researcher         | Self-report & parent report             | No               | 1++             |
| 43. Lassander et al (2020) | Stop & Breathe                                                                                      | Quantitative    | RCT                                           | Active control group  | Trained instructor | Neuropsychological tests & self-reports | No               | 1++             |
| 44. Le & Gobert (2015)     | Mind Body Awareness Project (MBA)                                                                   | Mixed           | Pre-post comparison (without a control group) | No control group      | Researcher         | Self-report                             | No               | 2+              |

| Author (year)                        | MBI                                                                                              | Research design | Evaluation design                             | Control               | Mediator           | Outcome measure type         | Teacher training | Evidence rating |
|--------------------------------------|--------------------------------------------------------------------------------------------------|-----------------|-----------------------------------------------|-----------------------|--------------------|------------------------------|------------------|-----------------|
| 45. Le & Trieu (2016)                | Mind Body Awareness Project                                                                      | Qualitative     | Pre-post comparison (without a control group) | No control group      | Teacher            | Teacher report & self-report | No               | 3               |
| 46. Livheim et al (2015)             | Australia: ACT Experiential Adolescent Group - 8 week program, Sweden: 6 week ACT group sessions | Quantitative    | RCT                                           | Active control group  | Researcher         | Self-report                  | No               | 1-              |
| 47. Malboeuf-Hurtubise et al (2017a) | 8 week MBI                                                                                       | Quantitative    | Case series                                   | No control group      | Researcher         | Teacher report & self-report | No               | 2-              |
| 48. Malboeuf-Hurtubise et al (2017b) | 8 week MBI                                                                                       | Quantitative    | Pre-post comparison (without a control group) | No control group      | Trained instructor | Self-report                  | No               | 2-              |
| 49. Metz et al (2013)                | Learning to BREATHE                                                                              | Quantitative    | Pre-post (with non randomized control group)  | Active control group  | Teacher            | Self-report                  | Yes              | 2+              |
| 50. Milligan et al (2016)            | Mindfulness-based martial arts program                                                           | Quantitative    | Pre-post (with non randomized control group)  | Passive control group | Trained instructor | Self-report                  | No               | 2+              |
| 51. Napoli et al (2005)              | 24 week mindfulness training                                                                     | Quantitative    | RCT                                           | Passive control group | Researcher         | Teacher report & self-report | Yes              | 1+              |
| 52. Parker et al (2014)              | Master Mind 4 week program                                                                       | Quantitative    | RCT                                           | Active control group  | Teacher            | Teacher report               | Yes              | 1-              |



| Author (year)                       | MBI                                                        | Research design | Evaluation design                             | Control               | Mediator               | Outcome measure type                             | Teacher training | Evidence rating |
|-------------------------------------|------------------------------------------------------------|-----------------|-----------------------------------------------|-----------------------|------------------------|--------------------------------------------------|------------------|-----------------|
| 53. Poehlmann-Tynan et al (2016)    | 12 week MBI                                                | Qualitative     | RCT                                           | Active control group  | Trained instructor     | Observation and cognitive tests                  | No               | 1-              |
| 54. Raes et al (2014)               | Combined elements of MBCT/ MBSR                            | Quantitative    | RCT                                           | Passive control group | Researcher             | Self-report                                      | No               | 1+              |
| 55. Ricarte et al (2015)            | 6 week MBI                                                 | Quantitative    | RCT                                           | Passive control group | Teacher                | self-report, cognitive tests                     | No               | 1+              |
| 56. Rush et al (2017)               | 12 week mind-body curriculum                               | Quantitative    | Pre-post (with non randomized control group)  | Active control group  | Researcher             | Observation & cognitive tests                    | No               | 2-              |
| 57. Schonert-Reichl & Lawlor (2010) | Mindfulness Education Program                              | Quantitative    | RCT                                           | Passive control group | Teacher                | Teacher report & self-report                     | Yes              | 1-              |
| 58. Schonert-Reichl et al (2015)    | Mindup                                                     | Quantitative    | RCT                                           | Active control group  | Teacher                | Teacher report, self-report, and cognitive tests | No               | 1+              |
| 59. Schussler et al (2018)          | CARE professional development                              | Qualitative     | Case series                                   | No control group      | Researcher             | Self-report                                      | Yes              | 3               |
| 60. Scitutto et al (2021)           | Mindful Schools, MindUp                                    | Quantitative    | Pre-post comparison (without a control group) | No control group      | Mindfulness Instructor | Teacher Ratings                                  | No               | 1++             |
| 61. Shapiro et al (2016)            | Stressoff Strategies: CBT and mindfulness based techniques | Mixed           | Pre-post comparison (without a control group) | No control group      | Researcher             | Self-report                                      | No               | 2-              |

| Author (year)                          | MBI                                | Research design | Evaluation design                              | Control               | Mediator               | Outcome measure type              | Teacher training | Evidence rating |
|----------------------------------------|------------------------------------|-----------------|------------------------------------------------|-----------------------|------------------------|-----------------------------------|------------------|-----------------|
| 62. Sibinga et al (2013)               | MBSR 12-session programs           | Quantitative    | RCT                                            | Active control group  | Researcher             | Self-report                       | No               | 1-              |
| 63. Sibinga et al (2016)               | MBSR - 12 week program             | Quantitative    | RCT                                            | Active control group  | Trained instructor     | Self-report                       | No               | 1+              |
| 64. Terjestam et al (2016)             | Compass program for 8 weeks        | Quantitative    | Pre-post (with non randomized control group)   | Active control group  | Teacher                | Teacher report & self-report      | Yes              | 2-              |
| 65. Tharaldsen (2012)                  | Conscious Coping Program           | Mixed           | RCT                                            | Active control group  | Researcher             | Self-report & interviews          | No               | 1-              |
| 66. Thomas & Atkinson (2017)           | Paws.b.                            | Mixed           | Pre-post comparison (without a control group)  | No control group      | Mindfulness instructor | Teacher report & self-report      | No               | 1+              |
| 67. van de Weijer-Bergsma et al (2012) | Mindfulkids: 12 week session       | Quantitative    | RCT                                            | Passive control group | Teacher and researcher | Teacher, parent, and child report | No               | 1-              |
| 68. Viafora et al (2015)               | 8 week mindfulness program         | Mixed           | Pre-post (with a non randomized control group) | Passive control group | Researcher             | Self-report                       | No               | 2-              |
| 69. Vickery & Dorjee (2016)            | Paws B: 8 week intervention        | Quantitative    | Pre-post (with non randomized control group)   | Passive control group | Teacher                | Teacher, parent, & self-report    | Yes              | 2-              |
| 70. Volanen et al (2020)               | 9 week MBI - healthy learning mind | Quantitative    | RCT                                            | Active control group  | Trained instructor     | Self-report                       | No               | 1++             |
| 71. Waldemar et al (2016)              | Mindfulness practice               | Quantitative    | Pre-post (with non                             | Passive control group | Trained instructor     | Teacher report & self-report      | No               | 2-              |

| Author (year)                 | MBI                                                                  | Research design | Evaluation design                             | Control               | Mediator               | Outcome measure type             | Teacher training | Evidence rating |
|-------------------------------|----------------------------------------------------------------------|-----------------|-----------------------------------------------|-----------------------|------------------------|----------------------------------|------------------|-----------------|
|                               |                                                                      |                 | randomized control group)                     |                       |                        |                                  |                  |                 |
| 72. Wilson & Dixon (2010)     | 4 week mindfulness education program                                 | Quantitative    | ABA                                           | No control group      | Researcher             | Observation                      | No               | 2-              |
| 73. Wimmer et al (2016)       | Mindfulness and concentration training                               | Quantitative    | RCT                                           | Passive control group | Researcher             | Cognitive tests                  | Yes              | 1-              |
| 74. Wisner (2013)             | Mindfulness meditation program: 8 week intervention                  | Qualitative     | Pre-post comparison (without a control group) | No control group      | Researcher             | Self-report                      | No               | 2+              |
| 75. Wisner & Starzec (2016)   | Mindfulness practices (mindfulness skills and journal entries)       | Qualitative     | Pre-post comparison (without a control group) | No control group      | Researcher and teacher | Self-report                      | No               | 2-              |
| 76. Worthen & Luiselli (2017) | Mindfulness: An Eight Week Plan for Finding Peace in a Frantic World | Quantitative    | Pre-post comparison (without a control group) | No control group      | Researcher             | Self-report                      | No               | 1+              |
| 77. Zelazo et al (2018)       | Mindfulness and reflection training: 6 week intervention             | Quantitative    | RCT                                           | Active control group  | Teacher                | Teacher report & cognitive tests | Yes              | 1-              |

*Note.* N/A means not available, MBI = Mindfulness Based Interventions, ACT = Acceptance and Commitment Therapy, MBSR = Mindfulness-based stress reduction, MBCT = Mindfulness-Based Cognitive Therapy
