# Supplementary material for: Mindfulness-Based School Interventions: a Systematic Review of Outcome Evidence Quality by Study Design
Source: Springer Nature journal article supplement (doi:10.1007/s12671-022-01885-9), 2022-05-23
Supplement: MOESM3 [file 22832882]

## **Mindfulness-based school interventions: A systematic review of outcome evidence quality by study design**

### *Mindfulness*

Mary L. Phan<sup>1</sup>, Tyler L. Renshaw<sup>1</sup>, Julie Caramanico<sup>2</sup>, Jeffrey M. Greeson<sup>3</sup>, Elizabeth MacKenzie<sup>4</sup>, Zabryna Atkinson-Diaz<sup>2</sup>, Natalie Doppelt<sup>2</sup>, Hungtzu Tai<sup>5</sup>, David S. Mandell<sup>2</sup>, and Heather J. Nuske<sup>2</sup>

<sup>1</sup>Department of Psychology, Utah State University, Logan, USA

<sup>2</sup>Penn Center for Mental Health, University of Pennsylvania, Philadelphia, USA

<sup>3</sup>Department of Psychology, Rowan University, Glassboro, USA

<sup>4</sup>Graduate School of Education, University of Pennsylvania, Philadelphia, USA

<sup>5</sup>School of Health in Social Science, University of Edinburgh, United Kingdom

Corresponding author email: [mary.phan@usu.edu](mailto:mary.phan@usu.edu)

### Online Resource 3

#### Numbered List of Included Studies from Table 2

1. Atkinson, M. J., & Wade, T. D. (2015). Mindfulness-based prevention for eating disorders: A school-based cluster randomized controlled study. *International Journal of Eating Disorders*, 48(7), 1024–1037. <https://doi.org/10.1002/eat.22416>
2. Bakosh, L. S., Snow, R. M., Tobias, J. M., Houlihan, J. L., & Barbosa-Leiker, C. (2016). Maximizing mindful learning: Mindful awareness intervention improves elementary school students' quarterly grades. *Mindfulness*, 7(1), 59–67. <https://doi.org/10.1007/s12671-015-0387-6>
3. Bakosh, L. S., Tobias Mortlock, J. M., Querstret, D., & Morison, L. (2018). Audio-guided mindfulness training in schools and its effect on academic attainment: Contributing to theory and practice. *Learning and Instruction*, 58, 34–41. <https://doi.org/10.1016/j.learninstruc.2018.04.012>
4. Bannirchelvam, B., Bell, K. L., & Costello, S. (2017). A qualitative exploration of primary school students' experience and utilisation of mindfulness. *Contemporary School Psychology*, 21(4), 304–316. <https://doi.org/10.1007/s40688-017-0141-2>
5. Bauer, C. C. C., Caballero, C., Scherer, E., West, M. R., Mrazek, M. D., Phillips, D. T., Whitfield-Gabrieli, S., & Gabrieli, J. D. E. (2019). Mindfulness training reduces stress and amygdala reactivity to fearful faces in middle-school children. *Behavioral Neuroscience*, 133(6), 569–585. <https://doi.org/10.1037/bne0000337>
6. Beauchemin, J., Hutchins, T. L., & Patterson, F. (2008). Mindfulness meditation may lessen anxiety, promote social skills, and improve academic performance among adolescents with learning disabilities. *Complementary Health Practice Review*, 13(1), 34–45. <https://doi.org/10.1177/1533210107311624>
7. Bei, B., Byrne, M. L., Ivens, C., Waloszek, J., Woods, M. J., Dudgeon, P., Murray, G., Nicholas, C. L., Trinder, J., & Allen, N. B. (2013). Pilot study of a mindfulness-based, multi-component, in-school group sleep intervention in adolescent girls. *Early Intervention in Psychiatry*, 7(2), 213–220. <https://doi.org/10.1111/j.1751-7893.2012.00382.x>
8. Bennett, K., & Dorjee, D. (2016). The impact of a Mindfulness-Based Stress Reduction course (MBSR) on well-being and academic attainment of sixth-form students. *Mindfulness*, 7(1), 105–114. <https://doi.org/10.1007/s12671-015-0430-7>
9. Berger, R., Brenick, A., & Tarrasch, R. (2018). Reducing Israeli-Jewish pupils' outgroup prejudice with a mindfulness and compassion-based social-emotional program. *Mindfulness*, 9(6), 1768–1779. <https://doi.org/10.1007/s12671-018-0919-y>
10. Bernay, R., Graham, E., Devcich, D. A., Rix, G., & Rubie-Davies, C. M. (2016). Pause, breathe, smile: A mixed-methods study of student well-being following participation in an eight-week, locally developed mindfulness program in three New Zealand schools. *Advances in School Mental Health Promotion*, 9(2), 90–106. <https://doi.org/10.1080/1754730X.2016.1154474>

11. Black, D. S., & Fernando, R. (2014). Mindfulness training and classroom behavior among lower-income and ethnic minority elementary school children. *Journal of Child and Family Studies*, 23(7), 1242–1246. <https://doi.org/10.1007/s10826-013-9784-4>
12. Bluth, K., Campo, R. A., Pruteanu-Malinici, S., Reams, A., Mullarkey, M., & Broderick, P. C. (2016). A school-based mindfulness pilot study for ethnically diverse at-risk adolescents. *Mindfulness*, 7(1), 90–104. <https://doi.org/10.1007/s12671-014-0376-1>
13. Bradley, C., Cordaro, D. T., Zhu, F., Vildostegui, M., Han, R. J., Brackett, M., & Jones, J. (2018). Supporting improvements in classroom climate for students and teachers with the four pillars of well-being curriculum. *Translational Issues in Psychological Science*, 4(3), 245. <https://doi.org/10.1037/tps0000162>
14. Britton, W. B., Lepp, N. E., Niles, H. F., Rocha, T., Fisher, N., & Gold, J. (2014). A randomized controlled pilot trial of classroom-based mindfulness meditation compared to an active control condition in 6th grade children. *Journal of School Psychology*, 52(3), 263–278. <https://doi.org/10.1016/j.jsp.2014.03.002>
15. Broderick, P. C., & Metz, S. (2009). Learning to BREATHE: A Pilot trial of a mindfulness curriculum for adolescents. *Advances in School Mental Health Promotion*, 2(1), 35–46. <https://doi.org/10.1080/1754730X.2009.9715696>
16. Burckhardt, R., Manicavasagar, V., Batterham, P. J., Hadzi-Pavlovic, D., & Shand, F. (2017). Acceptance and commitment therapy universal prevention program for adolescents: A feasibility study. *Child and Adolescent Psychiatry and Mental Health*, 11(1), 27. <https://doi.org/10.1186/s13034-017-0164-5>
17. Costello, E., & Lawler, M. (2014). An exploratory study of the effects of mindfulness on perceived levels of stress among school-children from lower socioeconomic backgrounds. *The International Journal of Emotional Education*, 6(2), 19.
18. Crescentini, C., Capurso, V., Furlan, S., & Fabbro, F. (2016). Mindfulness-oriented meditation for primary school children: Effects on attention and psychological well-being. *Frontiers in Psychology*, 7. <https://doi.org/10.3389/fpsyg.2016.00805>
19. Davenport, C., & Pagnini, F. (2016). Mindful learning: A case study of Langerian mindfulness in schools. *Frontiers in Psychology*, 7. <https://doi.org/10.3389/fpsyg.2016.01372>
20. der Gucht, K. V., Takano, K., Kuppens, P., & Raes, F. (2017). Potential moderators of the effects of a school-based mindfulness program on symptoms of depression in adolescents. *Mindfulness*, 8(3), 797–806. <https://doi.org/10.1007/s12671-016-0658-x>
21. Dove, C., & Costello, S. (2017). Supporting emotional well-being in schools: A pilot study into the efficacy of a mindfulness-based group intervention on anxious and depressive symptoms in children. *Advances in Mental Health*, 15(2), 172–182. <https://doi.org/10.1080/18387357.2016.1275717>
22. Emerson, L.-M., Rowse, G., & Sills, J. (2017). Developing a mindfulness-based program for infant schools: Feasibility, acceptability, and initial effects. *Journal of Research in Childhood Education*, 31(4), 465–477. <https://doi.org/10.1080/02568543.2017.1343211>
23. Eva, A. L., & Thayer, N. M. (2017). Learning to BREATHE: A pilot study of a mindfulness-based intervention to support marginalized youth. *Journal of Evidence-*

- Based Complementary & Alternative Medicine*, 22(4), 580–591.  
<https://doi.org/10.1177/2156587217696928>
24. Felver, J. C., Doerner, E., Jones, J., Kaye, N. C., & Merrell, K. W. (2013). Mindfulness in school psychology: Applications for intervention and professional practice. *Psychology in the Schools*, 50(6), 531–547. <https://doi.org/10.1002/pits.21695>
  25. Flook, L., Goldberg, S. B., Pinger, L., & Davidson, R. J. (2015). Promoting prosocial behavior and self-regulatory skills in preschool children through a mindfulness-based kindness curriculum. *Developmental Psychology*, 51(1), 44.  
<https://doi.org/10.1037/a0038256>
  26. Franco, C., Amutio, A., López-González, L., Oriol, X., & Martínez-Taboada, C. (2016). Effect of a mindfulness training program on the impulsivity and aggression levels of adolescents with behavioral problems in the classroom. *Frontiers in Psychology*, 7.  
<https://doi.org/10.3389/fpsyg.2016.01385>
  27. Fung, J., Guo, S., Jin, J., Bear, L., & Lau, A. (2016). A pilot randomized trial evaluating a school-based mindfulness intervention for ethnic minority youth. *Mindfulness*, 7(4), 819–828. <https://doi.org/10.1007/s12671-016-0519-7>
  28. Gouda, S., Luong, M. T., Schmidt, S., & Bauer, J. (2016). Students and teachers benefit from mindfulness-based stress reduction in a school-embedded pilot study. *Frontiers in Psychology*, 7. <https://doi.org/10.3389/fpsyg.2016.00590>
  29. Gould, L. F., Dariotis, J. K., Mendelson, T., & Greenberg, M. T. (2012). A school-based mindfulness intervention for urban youth: Exploring moderators of intervention effects. *Journal of Community Psychology*, 40(8), 968–982.
  30. Idler, A. M., Mercer, S. H., Starosta, L., & Bartfai, J. M. (2017). Effects of a mindful breathing exercise during reading fluency intervention for students with attentional difficulties. *Contemporary School Psychology*, 21(4), 323–334.  
<https://doi.org/10.1007/s40688-017-0132-3>
  31. Janz, P., Dawe, S., & Wyllie, M. (2019). Mindfulness-based program embedded within the existing curriculum improves executive functioning and behavior in young children: A waitlist controlled trial. *Frontiers in Psychology*, 10.  
<https://doi.org/10.3389/fpsyg.2019.02052>
  32. Johnson, C., Burke, C., Brinkman, S., & Wade, T. (2016). Effectiveness of a school-based mindfulness program for transdiagnostic prevention in young adolescents. *Behaviour Research and Therapy*, 81, 1–11. <https://doi.org/10.1016/j.brat.2016.03.002>
  33. Johnson, C., Burke, C., Brinkman, S., & Wade, T. (2017). A randomized controlled evaluation of a secondary school mindfulness program for early adolescents: Do we have the recipe right yet? *Behaviour Research and Therapy*, 99, 37–46.  
<https://doi.org/10.1016/j.brat.2017.09.001>
  34. Juliano, A. C., Alexander, A. O., DeLuca, J., & Genova, H. (2020). Feasibility of a school-based mindfulness program for improving inhibitory skills in children with autism spectrum disorder. *Research in Developmental Disabilities*, 101, 103641.  
<https://doi.org/10.1016/j.ridd.2020.103641>
  35. Kang, Y., Rahrig, H., Eichel, K., Niles, H. F., Rocha, T., Lepp, N. E., Gold, J., & Britton, W. B. (2018). Gender differences in response to a school-based mindfulness training

- intervention for early adolescents. *Journal of School Psychology*, 68, 163–176. <https://doi.org/10.1016/j.jsp.2018.03.004>
36. Kasson, E. M., & Wilson, A. N. (2016). Preliminary evidence on the efficacy of mindfulness combined with traditional classroom management strategies. *Behavior Analysis in Practice*, 10(3), 242–251. <https://doi.org/10.1007/s40617-016-0160-x>
37. Keller, J., Ruthruff, E., Keller, P., Hoy, R., Gaspelin, N., & Bertolini, K. (2017). “Your brain becomes a rainbow”: Perceptions and traits of 4th-graders in a school-based mindfulness intervention. *Journal of Research in Childhood Education*, 31(4), 508–529. <https://doi.org/10.1080/02568543.2017.1343212>
38. Kiehl, M., Gilligan, T., Staton, R., & Curtis, N. (2017). Cultivating mindfulness with third grade students via classroom-based interventions. *Contemporary School Psychology*, 21(4), 317–322. <https://doi.org/10.1007/s40688-017-0149-7>
39. Klatt, M., Harpster, K., Browne, E., White, S., & Case-Smith, J. (2013). Feasibility and preliminary outcomes for Move-Into-Learning: An arts-based mindfulness classroom intervention. *The Journal of Positive Psychology*, 8(3), 233–241. <https://doi.org/10.1080/17439760.2013.779011>
40. Kurth, L., Engelniederhammer, A., Sasse, H., & Papastefanou, G. (2020). Effects of a short mindful-breathing intervention on the psychophysiological stress reactions of German elementary school children. *School Psychology International*, 41(3), 218–238. <https://doi.org/10.1177/0143034320903480>
41. Lagor, A. F., Williams, D. J., Lerner, J. B., & McClure, K. S. (2013). Lessons learned from a mindfulness-based intervention with chronically ill youth. *Clinical Practice in Pediatric Psychology*, 1(2), 146. <https://doi.org/10.1037/cpp0000015>
42. Lam, K. (2016). School-based cognitive mindfulness intervention for internalizing problems: Pilot study with Hong Kong elementary students. *Journal of Child and Family Studies*, 25(11), 3293–3308. <https://doi.org/10.1007/s10826-016-0483-9>
43. Lassander, M., Hintsanen, M., Suominen, S., Mullola, S., Fagerlund, Å., Vahlberg, T., & Volanen, S.-M. (2020). The Effects of School-based Mindfulness Intervention on Executive Functioning in a Cluster Randomized Controlled Trial. *Developmental Neuropsychology*, 45(7/8), 469–484. <https://doi.org/10.1080/87565641.2020.1856109>
44. Le, T. N., & Gobert, J. M. (2015). Translating and implementing a mindfulness-based youth suicide prevention intervention in a Native American community. *Journal of Child and Family Studies*, 24(1), 12–23. <https://doi.org/10.1007/s10826-013-9809-z>
45. Le, T. N., & Trieu, D. T. (2016). Feasibility of a mindfulness-based intervention to address youth issues in Vietnam. *Health Promotion International*, 31(2), 470–479. <https://doi.org/10.1093/heapro/dau101>
46. Livheim, F., Hayes, L., Ghaderi, A., Magnusdottir, T., Högfeltdt, A., Rowse, J., Turner, S., Hayes, S. C., & Tengström, A. (2015). The effectiveness of acceptance and commitment therapy for adolescent mental health: Swedish and Australian pilot outcomes. *Journal of Child and Family Studies*, 24(4), 1016–1030. <https://doi.org/10.1007/s10826-014-9912-9>
47. Malboeuf-Hurtubise, C., Lacourse, E., Herba, C., Taylor, G., & Amor, L. B. (2017a). Mindfulness-based intervention in elementary school students with anxiety and

- depression: A series of n-of-1 trials on effects and feasibility. *Journal of Evidence-Based Complementary & Alternative Medicine*, 22(4), 856–869.  
<https://doi.org/10.1177/2156587217726682>
48. Malboeuf-Hurtubise, C., Lacourse, E., Taylor, G., Joussemet, M., & Ben Amor, L. (2017b). A mindfulness-based intervention pilot feasibility study for elementary school students with severe learning difficulties: Effects on internalized and externalized symptoms from an emotion regulation perspective. *Journal of Evidence-Based Complementary & Alternative Medicine*, 22(3), 473–481.  
<https://doi.org/10.1177/2156587216683886>
49. Metz, S. M., Frank, J. L., Reibel, D., Cantrell, T., Sanders, R., & Broderick, P. C. (2013). The effectiveness of the learning to BREATHE program on adolescent emotion regulation. *Research in Human Development*, 10(3), 252–272.  
<https://doi.org/10.1080/15427609.2013.818488>
50. Milligan, K., Irwin, A., Wolfe-Miscio, M., Hamilton, L., Mintz, L., Cox, M., Gage, M., Woon, S., & Phillips, M. (2016). Mindfulness enhances use of secondary control strategies in high school students at risk for mental health challenges. *Mindfulness*, 7(1), 219–227. <https://doi.org/10.1007/s12671-015-0466-8>
51. Napoli, D. M., Krech, P. R., & Holley, L. C. (2005). Mindfulness training for elementary school students. *Journal of Applied School Psychology*, 21(1), 99–125.  
[https://doi.org/10.1300/J370v21n01\\_05](https://doi.org/10.1300/J370v21n01_05)
52. Parker, A. E., Kupersmidt, J. B., Mathis, E. T., Scull, T. M., & Sims, C. (2014). The impact of mindfulness education on elementary school students: Evaluation of the *Master Mind* program. *Advances in School Mental Health Promotion*, 7(3), 184–204.  
<https://doi.org/10.1080/1754730X.2014.916497>
53. Poehlmann-Tynan, J., Vigna, A. B., Weymouth, L. A., Gerstein, E. D., Burnson, C., Zabransky, M., Lee, P., & Zahn-Waxler, C. (2016). A pilot study of contemplative practices with economically disadvantaged preschoolers: Children’s empathic and self-regulatory behaviors. *Mindfulness*, 7(1), 46–58. <https://doi.org/10.1007/s12671-015-0426-3>
54. Raes, F., Griffith, J. W., Van der Gucht, K., & Williams, J. M. G. (2014). School-based prevention and reduction of depression in adolescents: A cluster-randomized controlled trial of a mindfulness group program. *Mindfulness*, 5(5), 477–486.  
<https://doi.org/10.1007/s12671-013-0202-1>
55. Ricarte, J. J., Ros, L., Latorre, J. M., & Beltrán, M. T. (2015). Mindfulness-based intervention in a rural primary school: Effects on attention, concentration and mood. *International Journal of Cognitive Therapy*, 8(3), 258–270.  
[https://doi.org/10.1521/ijct\\_2015\\_8\\_03](https://doi.org/10.1521/ijct_2015_8_03)
56. Rush, K. S., Golden, M. E., Mortenson, B. P., Albohn, D., & Horger, M. (2017). The effects of a mindfulness and biofeedback program on the on- and off-task behaviors of students with emotional behavioral disorders. *Contemporary School Psychology*, 21(4), 347–357. <https://doi.org/10.1007/s40688-017-0140-3>

57. Schonert-Reichl, K. A., & Lawlor, M. S. (2010). The effects of a mindfulness-based education program on pre- and early adolescents' well-being and social and emotional competence. *Mindfulness*, 1(3), 137–151. <https://doi.org/10.1007/s12671-010-0011-8>
58. Schonert-Reichl, K. A., Oberle, E., Lawlor, M. S., Abbott, D., Thomson, K., Oberlander, T. F., & Diamond, A. (2015). Enhancing cognitive and social–emotional development through a simple-to-administer mindfulness-based school program for elementary school children: A randomized controlled trial. *Developmental Psychology*, 51(1), 52. <https://doi.org/10.1037/a0038454>
59. Schussler, D. L., DeWeese, A., Rasheed, D., DeMauro, A., Brown, J., Greenberg, M., & Jennings, P. A. (2018). Stress and release: Case studies of teacher resilience following a mindfulness-based intervention. *American Journal of Education*, 125(1), 1–28. <https://doi.org/10.1086/699808>
60. Sciotto, M. J., Veres, D. A., Marinstein, T. L., Bailey, B. F., & Cehelyk, S. K. (2021). Effects of a school-based mindfulness program for young children. *Journal of Child & Family Studies*, 30(6), 1516–1527. <https://doi.org/10.1007/s10826-021-01955-x>
61. Shapiro, A. J., Heath, N. L., & Carsley, D. (2016). Pilot evaluation of the feasibility and acceptability of StressOFF Strategies: A single-session school-based stress management program for adolescents. *Advances in School Mental Health Promotion*, 9(1), 12–28. <https://doi.org/10.1080/1754730X.2015.1110494>
62. Sibinga, E. M. S., Perry-Parrish, C., Chung, S., Johnson, S. B., Smith, M., & Ellen, J. M. (2013). School-based mindfulness instruction for urban male youth: A small randomized controlled trial. *Preventive Medicine*, 57(6), 799–801. <https://doi.org/10.1016/j.ypmed.2013.08.027>
63. Sibinga, E. M. S., Webb, L., Ghazarian, S. R., & Ellen, J. M. (2016). School-based mindfulness instruction: An RCT. *Pediatrics*, 137(1). <https://doi.org/10.1542/peds.2015-2532>
64. Terjestam, Y., Bengtsson, H., & Jansson, A. (2016). Cultivating awareness at school. Effects on effortful control, peer relations and well-being at school in grades 5, 7, and 8. *School Psychology International*, 37(5), 456–469. <https://doi.org/10.1177/0143034316658321>
65. Tharaldsen, K. (2012). Mindful coping for adolescents: Beneficial or confusing. *Advances in School Mental Health Promotion*, 5(2), 105–124. <https://doi.org/10.1080/1754730X.2012.691814>
66. Thomas, G., & Atkinson, C. (2017). Perspectives on a whole class mindfulness programme. *Educational Psychology in Practice*, 33(3), 231–248. <https://doi.org/10.1080/02667363.2017.1292396>
67. van de Weijer-Bergsma, E., Langenberg, G., Brandsma, R., Oort, F. J., & Bögels, S. M. (2012). The effectiveness of a school-based mindfulness training as a program to prevent stress in elementary school children. *Mindfulness*. <https://doi.org/10.1007/s12671-012-0171-9>
68. Viafora, D. P., Mathiesen, S. G., & Unsworth, S. J. (2015). Teaching mindfulness to middle school students and homeless youth in school classrooms. *Journal of Child and Family Studies*, 24(5), 1179–1191. <https://doi.org/10.1007/s10826-014-9926-3>

69. Vickery, C. E., & Dorjee, D. (2016). Mindfulness training in primary schools decreases negative affect and increases meta-cognition in children. *Frontiers in Psychology, 6*. <https://doi.org/10.3389/fpsyg.2015.02025>
70. Volanen, S.-M., Lassander, M., Hankonen, N., Santalahti, P., Hintsanen, M., Simonsen, N., Raevuori, A., Mullola, S., Vahlberg, T., But, A., & Suominen, S. (2020). Healthy learning mind – Effectiveness of a mindfulness program on mental health compared to a relaxation program and teaching as usual in schools: A cluster-randomised controlled trial. *Journal of Affective Disorders, 260*, 660–669. <https://doi.org/10.1016/j.jad.2019.08.087>
71. Waldemar, J. O. C., Rigatti, R., Menezes, C. B., Guimarães, G., Falceto, O., & Heldt, E. (2016). Impact of a combined mindfulness and social–emotional learning program on fifth graders in a Brazilian public school setting. *Psychology & Neuroscience, 9*(1), 79. <https://doi.org/10.1037/pne0000044>
72. Wilson, A. N., & Dixon, M. R. (2010). A mindfulness approach to improving classroom attention. *Journal of Behavioral Health and Medicine, 1*(2), 137. <https://doi.org/10.1037/h0100547>
73. Wimmer, L., Bellingrath, S., & von Stockhausen, L. (2016). Cognitive effects of mindfulness training: Results of a pilot study based on a theory driven approach. *Frontiers in Psychology, 7*. <https://doi.org/10.3389/fpsyg.2016.01037>
74. Wisner, B. L. (2013). Less stress, less drama, and experiencing Monkey Mind: Benefits and challenges of a school-based meditation program for adolescents. *School Social Work Journal, 38*(1), 49–63.
75. Wisner, B. L., & Starzec, J. J. (2016). The process of personal transformation for adolescents practicing mindfulness skills in an alternative school setting. *Child and Adolescent Social Work Journal, 33*(3), 245–257. <https://doi.org/10.1007/s10560-015-0418-0>
76. Worthen, D., & Luiselli, J. K. (2017). Social validity assessment and intervention evaluation of mindfulness education and practices with high school students. *Mindfulness, 8*(4), 903–910. <https://doi.org/10.1007/s12671-016-0664-z>
77. Zelazo, P. D., Forston, J. L., Masten, A. S., & Carlson, S. M. (2018). Mindfulness plus reflection training: Effects on executive function in early childhood. *Frontiers in Psychology, 9*. <https://doi.org/10.3389/fpsyg.2018.00208>
