# Supplementary material for: Mindfulness-Based School Interventions: a Systematic Review of Outcome Evidence Quality by Study Design
Source: Springer Nature journal article supplement (doi:10.1007/s12671-022-01885-9), 2022-05-23
Supplement: MOESM4 [file 22832882]

## **Mindfulness-based school interventions: A systematic review of outcome evidence quality by study design**

### *Mindfulness*

Mary L. Phan<sup>1</sup>, Tyler L. Renshaw<sup>1</sup>, Julie Caramanico<sup>2</sup>, Jeffrey M. Greeson<sup>3</sup>, Elizabeth MacKenzie<sup>4</sup>, Zabryna Atkinson-Diaz<sup>2</sup>, Natalie Doppelt<sup>2</sup>, Hungtzu Tai<sup>5</sup>, David S. Mandell<sup>2</sup>, and Heather J. Nuske<sup>2</sup>

<sup>1</sup>Department of Psychology, Utah State University, Logan, USA

<sup>2</sup>Penn Center for Mental Health, University of Pennsylvania, Philadelphia, USA

<sup>3</sup>Department of Psychology, Rowan University, Glassboro, USA

<sup>4</sup>Graduate School of Education, University of Pennsylvania, Philadelphia, USA

<sup>5</sup>School of Health in Social Science, University of Edinburgh, United Kingdom

Corresponding author email: [mary.phan@usu.edu](mailto:mary.phan@usu.edu)

**Online Resource 4**

*Results and Evidence Grades from MBSI studies, Broken Down by Research Design, Evaluation Design and Control Group Type*

Color Coding:

Research Design: quantitative, mixed, qualitative

Evaluation Design: RCTs, pre-post, single-case designs/case studies/series

Control Group Type: active, passive, no control group

| Category                     | Results                              | Reference # –<br>Research Design<br>Breakdown<br>(Study Evidence<br>Rating #) | Reference # –<br>Eval. Design<br>Breakdown | Reference # –<br>Control Group<br>Breakdown | Grade of<br>Evidence<br>(Across<br>Studies) |
|------------------------------|--------------------------------------|-------------------------------------------------------------------------------|--------------------------------------------|---------------------------------------------|---------------------------------------------|
| <b>1) Wellbeing</b>          | ↑ wellbeing                          | 35 (1++), 45 (3), 64 (2-), 67 (1-), 68 (2-)                                   | 35, 45, 64, 67, 68                         | 35, 45, 64, 67, 68                          | A                                           |
|                              | = wellbeing                          | 10 (1++), 16 (1-), 22 (2-), 32 (1-), 33 (1-)                                  | 10, 16, 22, 32, 33                         | 10, 16, 22, 32, 33                          | A                                           |
|                              | ↑ feelings of contentment            | 13 (2-)                                                                       | 13                                         | 13                                          | D                                           |
|                              | ↓ life satisfaction                  | 65 (1-)                                                                       | 65                                         | 65                                          | C                                           |
| <b>2) Self-compassion</b>    | <i>Self-compassion/intrapersonal</i> |                                                                               |                                            |                                             |                                             |
|                              | ↑ self-compassion                    | 13 (2-)                                                                       | 13                                         | 13                                          | D                                           |
|                              | ↑ intrapersonal strengths            | 73 (1-)                                                                       | 73                                         | 73                                          | C                                           |
|                              | ↑ embracing life                     | 45 (3)                                                                        | 45                                         | 45                                          | D                                           |
|                              | ↑ self-acceptance                    | 15 (1-)                                                                       | 15                                         | 15                                          | C                                           |
|                              | ↑ school self-concept                | 58 (1+)                                                                       | 58                                         | 58                                          | B                                           |
|                              | ↓ inferiority complex                | 45 (3)                                                                        | 45                                         | 45                                          | D                                           |
| <b>3) Social functioning</b> | <i>Social relationships</i>          |                                                                               |                                            |                                             |                                             |
|                              | ↑ interpersonal problems             | 28 (2-)                                                                       | 28                                         | 28                                          | D                                           |
|                              | ↑ interpersonal strengths            | 73 (1-)                                                                       | 73                                         | 73                                          | C                                           |
|                              | ↑ psychosocial functioning           | 73 (1-)                                                                       | 73                                         | 73                                          | C                                           |
|                              | ↑ relationships with others          | 71 (2-)                                                                       | 71                                         | 71                                          | D                                           |
|                              | ↑ prosocial behavior                 | 60 (1++), 71 (2-)                                                             | 60, 71                                     | 60, 71                                      | A                                           |
|                              | = psychosocial adjustment            | 47 (2-)                                                                       | 47                                         | 47                                          | D                                           |
|                              | ↑ empathy                            | 45 (3), 58 (1+)                                                               | 45, 58                                     | 45, 58                                      | B                                           |
|                              | = empathy                            | 53 (1-)                                                                       | 53                                         | 53                                          | C                                           |
|                              | ↑ connection with others             | 45 (3)                                                                        | 45                                         | 45                                          | D                                           |
|                              | = compassion                         | 53 (1-)                                                                       | 53                                         | 53                                          | C                                           |
|                              | ↑ caring/respect for others          | 11 (2-)                                                                       | 11                                         | 11                                          | D                                           |
|                              | ↑ social competence                  | 25 (1+)                                                                       | 25                                         | 25                                          | B                                           |
|                              | ↑ social skills                      | 6 (2-)                                                                        | 6                                          | 6                                           | D                                           |
|                              | ↓ social problems                    | 52 (1-)                                                                       | 52                                         | 52                                          | C                                           |
| <i>Social participation</i>  |                                      |                                                                               |                                            |                                             |                                             |
| ↑ collaboration              | 19 (3)                               | 19                                                                            | 19                                         | D                                           |                                             |
| ↑ communication              | 19 (3)                               | 19                                                                            | 19                                         | D                                           |                                             |

|                                            |                                                             |                                                     |                       |                       |   |
|--------------------------------------------|-------------------------------------------------------------|-----------------------------------------------------|-----------------------|-----------------------|---|
|                                            | ↑ participation in activities                               | 11 (2-)                                             | 11                    | 11                    | D |
|                                            | <b>Social bias</b>                                          |                                                     |                       |                       |   |
|                                            | ↓ Stereotype/prejudice towards Israeli-Palestinian outgroup | 9 (1+)                                              | 9                     | 9                     | B |
| <b>4) Mental health</b>                    | <b>Depression</b>                                           |                                                     |                       |                       |   |
|                                            | ↓ depressive symptoms                                       | 8 (2+), 12 (1-), 20 (1-), 46 (1-), 48 (2-), 54 (1+) | 8, 12, 20, 46, 48, 54 | 8, 12, 20, 46, 48, 54 | B |
|                                            | = depressive symptoms                                       | 16 (1-), 18 (1++), 32 (1-), 33 (1-)                 | 16, 18, 32, 33        | 16, 18, 32, 33        | A |
|                                            | ↓ rumination                                                | 62 (1-)                                             | 62                    | 62                    | C |
|                                            | <b>Anxiety</b>                                              |                                                     |                       |                       |   |
|                                            | ↓ anxiety symptoms                                          | 7 (2-), 8 (2+), 41 (2-), 48 (2-), 62 (1-), 63 (1+)  | 7, 8, 41, 48, 62, 63  | 7, 8, 41, 48, 62, 63  | B |
|                                            | ↓ GAD                                                       | 42 (1++)                                            | 42                    | 42                    | A |
|                                            | ↓ state and trait anxiety                                   | 6 (2-)                                              | 6                     | 6                     | D |
|                                            | = anxiety                                                   | 16 (1-), 32 (1-), 33 (1-)                           | 16, 32, 33            | 16, 32, 33            | C |
|                                            | ↓ worry                                                     | 42 (1++)                                            | 42                    | 42                    | A |
|                                            | ↓ panic disorder                                            | 42 (1++)                                            | 42                    | 42                    | A |
|                                            | ↓ OCD                                                       | 42 (1++)                                            | 42                    | 42                    | A |
|                                            | ↓ psychosomatic complaints                                  | 49 (2+)                                             | 49                    | 49                    | C |
|                                            | ↓ internalizing problems                                    | 14 (1-), 18 (1++), 27 (1-), 42 (1++)                | 14, 18, 27, 42        | 14, 18, 27, 42        | A |
|                                            | <b>Suicidality</b>                                          |                                                     |                       |                       |   |
|                                            | ↓ suicidal thoughts                                         | 44 (2+)                                             | 44                    | 44                    | C |
|                                            | <b>Trauma</b>                                               |                                                     |                       |                       |   |
|                                            | ↓ posttraumatic symptoms                                    | 63 (1+)                                             | 63                    | 63                    | B |
|                                            | <b>Eating disorder</b>                                      |                                                     |                       |                       |   |
|                                            | ↓ dietary restraint                                         | 1 (1-)                                              | 1                     | 1                     | C |
|                                            | ↓ thin ideal internalization                                | 1 (1-)                                              | 1                     | 1                     | C |
|                                            | ↓ eating disorder symptoms                                  | 1 (1-)                                              | 1                     | 1                     | C |
|                                            | ↓ psychosocial impairment                                   | 1 (1-)                                              | 1                     | 1                     | C |
|                                            | = weight/shape concern                                      | 32 (1-), 33 (1-)                                    | 32, 33                | 32, 33                | C |
|                                            | ↓ weight/shape concern                                      | 1 (1-)                                              | 1                     | 1                     | C |
| <b>5) Self-regulation and emotionality</b> | <b>Self-regulation</b>                                      |                                                     |                       |                       |   |
|                                            | ↑ self-regulation                                           | 23 (2-), 28 (2-), 44 (2+), 53 (1-), 66 (1+)         | 23, 28, 44, 53, 66    | 23, 28, 44, 53, 66    | B |
|                                            | ↑ emotion regulation                                        | 4 (2-), 15 (1-), 49 (2+), 58 (1+), 71 (2-)          | 4, 15, 49, 58, 71     | 4, 15, 49, 58, 71     | B |
|                                            | ↑ resilience                                                | 70 (1++)                                            | 70                    | 70                    | A |
|                                            | ↑ coping skills                                             | 63 (1+)                                             | 63                    | 63                    | B |
|                                            | ↑ distress tolerance                                        | 59 (3)                                              | 59                    | 59                    | D |
|                                            | ↑ emotional awareness                                       | 49 (2+)                                             | 49                    | 49                    | C |

|                             |                                                |                                                                |                            |                            |   |
|-----------------------------|------------------------------------------------|----------------------------------------------------------------|----------------------------|----------------------------|---|
|                             | ↑ emotional clarity                            | 49 (2+)                                                        | 49                         | 49                         | C |
|                             | ↑ feelings of relaxation                       | 15 (1-)                                                        | 15                         | 15                         | C |
|                             | ↑ relaxed in school                            | 66 (1+)                                                        | 66                         | 66                         | B |
|                             | ↑ calmness                                     | 15 (1-)                                                        | 15                         | 15                         | C |
|                             | ↑ self-control                                 | 11 (2-), 75 (2-)                                               | 11, 75                     | 11, 75                     | D |
|                             | ↑ effortful control                            | 64 (2-)                                                        | 64                         | 64                         | D |
|                             | ↑ anger management skills                      | 68 (2-)                                                        | 68                         | 68                         | D |
|                             | ↑ executive function                           | 31 (1++), 34 (2-), 43 (1++), 52 (1-), 77 (1-)                  | 31, 34, 43, 52, 77         | 31, 34, 43, 52, 77         | A |
|                             | ↑ cognitive control                            | 50 (2+), 58 (1+)                                               | 50, 58                     | 50, 58                     | B |
|                             | ↑ cognitive inhibition                         | 74 (2+)                                                        | 74                         | 74                         | C |
|                             | <b>Emotionality</b>                            |                                                                |                            |                            |   |
|                             | ↑ positive mood                                | 45 (1-), 55 (1+)                                               | 45, 55                     | 45, 55                     | B |
|                             | ↓ negative feelings                            | 9 (1+), 21 (2+), 37 (1+)                                       | 9, 21, 37                  | 9, 21, 37                  | B |
|                             | ↓ negative affect = negative affect            | 15 (1-), 45 (3), 69 (2-), 16 (1-)                              | 15, 45, 69, 16             | 15, 45, 69, 16             | C |
| <b>6) Mindful awareness</b> | <b>Mindfulness</b>                             |                                                                |                            |                            |   |
|                             | ↑ mindfulness                                  | 10 (1++), 21 (2+), 23 (2-), 37 (1+), 59 (3)                    | 10, 21, 23, 37, 59         | 10, 21, 23, 37, 59         | A |
|                             | = mindfulness                                  | 22 (2-), 33 (1-), 38 (2+)                                      | 22, 33, 38                 | 22, 33, 38                 | C |
|                             | ↑ awareness of thoughts                        | 76 (1+)                                                        | 76                         | 76                         | B |
|                             | ↑ awareness of feelings                        | 76 (1+)                                                        | 76                         | 76                         | B |
|                             | ↑ awareness of emotions                        | 76 (1+)                                                        | 76                         | 76                         | B |
|                             | ↑ awareness of bodily sensations               | 76 (1+)                                                        | 76                         | 76                         | B |
|                             | ↑ being present in life                        | 76 (1+)                                                        | 76                         | 76                         | B |
|                             | ↑ sense of efficacy                            | 59 (3)                                                         | 59                         | 59                         | D |
|                             | ↓ mind wandering                               | 58 (1+)                                                        | 58                         | 58                         | B |
|                             | <b>Positive outlook</b>                        |                                                                |                            |                            |   |
|                             | ↑ optimism                                     | 23 (2-), 57 (1-)                                               | 23, 57                     | 23, 57                     | C |
|                             | ↑ positive thinking                            | 23 (2-)                                                        | 23                         | 23                         | D |
|                             | <b>Perspective-taking</b>                      |                                                                |                            |                            |   |
|                             | ↑ perspective-taking                           | 58 (1+)                                                        | 58                         | 58                         | B |
| <b>7) Attentional focus</b> | <b>Attention</b>                               |                                                                |                            |                            |   |
|                             | ↑ attention                                    | 11 (2-), 22 (2-), 31 (1++), 37 (1+), 53 (1-), 66 (1+), 72 (2-) | 11, 22, 31, 37, 53, 66, 72 | 11, 22, 31, 37, 53, 66, 72 | A |
|                             | ↑ selective attention                          | 51 (2+)                                                        | 51                         | 51                         | C |
|                             | ↑ attention awareness                          | 23 (2-)                                                        | 23                         | 23                         | D |
|                             | ↑ concentration                                | 55 (1+)                                                        | 55                         | 55                         | B |
|                             | ↑ controlled thoughts                          | 75 (2-)                                                        | 75                         | 75                         | D |
|                             | ↑ on-task behavior = task-shifted facilitation | 36 (2-), 56 (2-), 1 (1-)                                       | 36, 56, 1                  | 36, 56, 1                  | D |
|                             | ↓ attention problems                           | 14 (1-), 18 (1++), 48 (2-)                                     | 14, 18, 48                 | 14, 18, 48                 | A |
|                             | ↓ distractibility                              | 66 (1+)                                                        | 66                         | 66                         | B |
|                             | ↓ off task behaviors                           | 24 (3), 56 (2-)                                                | 24, 56                     | 24, 56                     | D |
|                             | ↓ ADHD behaviors                               | 51 (1+), 60 (1++)                                              | 51, 60                     | 51, 60                     | A |

|                                               |                                                     |                                                                       |                               |                               |   |
|-----------------------------------------------|-----------------------------------------------------|-----------------------------------------------------------------------|-------------------------------|-------------------------------|---|
|                                               | <b>Impulsivity</b>                                  |                                                                       |                               |                               |   |
|                                               | ↓ impulsivity                                       | 26 (1+)                                                               | 26                            | 26                            | B |
| <b>8)</b>                                     | <b>Psychological stress</b>                         |                                                                       |                               |                               |   |
| <b>Psychological and physiological stress</b> | ↓ stress                                            | 5 (1+), 17 (2-), 29 (2-), 46 (1-), 49 (2+), 67 (1-), 68 (2-), 75 (2-) | 5, 17, 29, 46, 49, 67, 68, 75 | 5, 17, 29, 46, 49, 67, 68, 75 | B |
|                                               | ↑ stress                                            | 28 (2-), 61 (2-)                                                      | 28, 61                        | 28, 61                        | D |
|                                               | = stress                                            | 16 (1-)                                                               | 16                            | 16                            | C |
|                                               | <b>Physiological stress</b>                         |                                                                       |                               |                               |   |
|                                               | ↑ stress physiology – skin temperature/conductivity | 40 (1+)                                                               | 40                            | 40                            | B |
|                                               | ↓ stress physiology – cortisol                      | 58 (1+)                                                               | 58                            | 58                            | B |
|                                               | ↓ right amygdala activation to fearful stimulus     | 5 (1+)                                                                | 5                             | 5                             | B |
|                                               | ↓ tiredness                                         | 15 (1-)                                                               | 15                            | 15                            | C |
|                                               | ↓ aches/pains                                       | 15 (1-)                                                               | 15                            | 15                            | C |
|                                               | ↑ sleep                                             | 7 (2-)                                                                | 7                             | 7                             | D |
|                                               | ↑ functional connectivity                           | 5 (1+)                                                                | 5                             | 5                             | B |
|                                               | ↑ brain plasticity                                  | 5 (1+)                                                                | 5                             | 5                             | B |
| <b>9) Problem behaviors</b>                   | ↓ aggression                                        | 26 (1+), 48 (2-), 52 (1-)                                             | 26, 48, 52                    | 26, 48, 52                    | B |
|                                               | ↓ disruptive behaviors                              | 39 (2-)                                                               | 39                            | 39                            | D |
|                                               | ↓ conduct behavior                                  | 2 (2+), 48 (2-), 60 (1++), 71 (2-)                                    | 2, 48, 60, 71                 | 2, 48, 60, 71                 | A |
|                                               | ↓ externalizing problems                            | 14 (1-), 27 (1-)                                                      | 14, 27                        | 14, 27                        | C |
| <b>10) Academic performance</b>               | <b>General academic performance</b>                 |                                                                       |                               |                               |   |
|                                               | ↑ school specific efficacy                          | 28 (2-)                                                               | 28                            | 28                            | D |
|                                               | ↑ academic performance                              | 6 (2-), 8 (2+), 25 (1+)                                               | 6, 8, 25                      | 6, 8, 25                      | B |
|                                               | ↑ creativity                                        | 19 (3)                                                                | 19                            | 19                            | D |
|                                               | ↑ critical thinking                                 | 19 (3)                                                                | 19                            | 19                            | D |
|                                               | ↑ meta cognition                                    | 69 (2-)                                                               | 69                            | 69                            | D |
|                                               | ↑ auditory-verbal memory                            | 55 (1+)                                                               | 55                            | 55                            | B |
|                                               | ↑ GPA                                               | 3 (1+)                                                                | 3                             | 3                             | B |
|                                               | ↑ data-driven information processing                | 74 (2+)                                                               | 74                            | 74                            | C |
|                                               | ↑ academically engaged behavior                     | 24 (3)                                                                | 24                            | 24                            | D |
|                                               | ↑ positive attitude towards academic subjects       | 37 (1+)                                                               | 37                            | 37                            | B |
|                                               | ↓ test anxiety                                      | 51 (1+)                                                               | 51                            | 51                            | B |
|                                               | ↓ cognitive errors                                  | 50 (2+)                                                               | 50                            | 50                            | C |
|                                               | <b>Math</b>                                         |                                                                       |                               |                               |   |

|                      |                                                   |                          |           |           |   |
|----------------------|---------------------------------------------------|--------------------------|-----------|-----------|---|
|                      | ↑ math performance                                | 58 (1+)                  | 58        | 58        | B |
|                      | ↑ math score                                      | 3 (1+)                   | 3         | 3         | B |
|                      | <b>Reading</b>                                    |                          |           |           |   |
|                      | ↑ grades in reading                               | 2 (2+)                   | 2         | 2         | C |
|                      | = reading fluency                                 | 30 (3)                   | 30        | 30        | D |
|                      | <b>Science</b>                                    |                          |           |           |   |
|                      | ↑ grades in science                               | 2 (2+)                   | 2         | 2         | C |
|                      | <b>Social studies</b>                             |                          |           |           |   |
|                      | ↑ social studies score                            | 3 (1+)                   | 3         | 3         | B |
| <b>11)</b>           | ↑ satisfaction with program                       | 61 (2-)                  | 61        | 61        | D |
| <b>Acceptability</b> | ↑ understanding and willingness to use strategies | 61 (2-)                  | 61        | 61        | D |
|                      | ↑ acceptance of mindfulness                       | 7 (2-), 32 (1-), 68 (2-) | 7, 32, 68 | 7, 32, 68 | C |

*Note.* ↑ increase, ↓ decrease, = no change, GAD = Generalized Anxiety Disorder, OCD = Obsessive Compulsive Disorder. See Appendix C for numbered list of included studies.
